# Supplementary material
Source: Royal Society of Chemistry journal article supplement (doi:10.1039/d5nj04732c)
Supplement: d5nj04732c1.pdf [file d5nj04732c1.pdf]

## Supporting Information

### Bioethanol Guerbet condensation reaction: Construction of a highly active and stable catalytic system

Mengying He, Yuyang Cui, Xinqiang Zhao\*, Hualiang An\*, Yanji Wang

Hebei Provincial Key Laboratory of Green Chemical Technology and Efficient Energy Saving,  
School of Chemical Engineering and Technology, Hebei University of Technology, Tianjin  
300130, China

\*Corresponding author. E-mail addresses: anhl@hebut.edu.cn (Hualiang An);  
zhaoxq@hebut.edu.cn (Xinqiang Zhao)

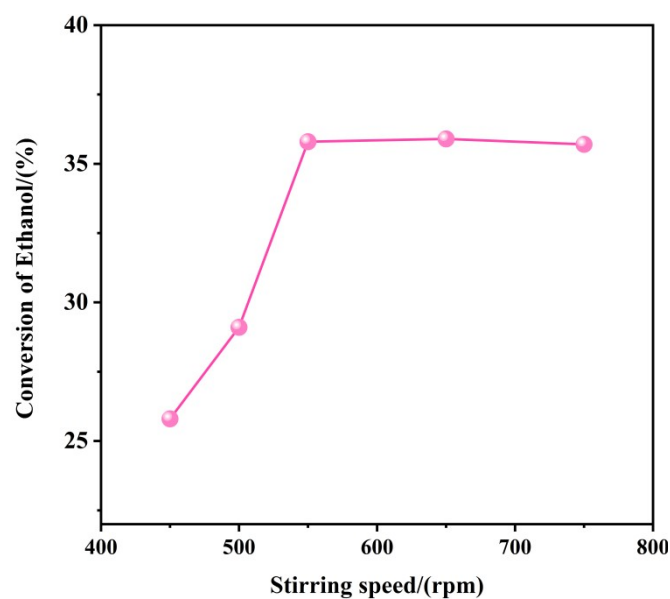

Figure S1 Effect of stirring speed on ethanol conversion over 10%Ni/HAP.

Reaction conditions: a weight percentage of catalyst=10 wt.%, t=6 h, T=230 °C.

Table S1 Catalytic performance of 10%Ni/HAP prepared at different pH values

| pH<br>value | Ethanol<br>conversion /% | <i>n</i> -Butanol<br>yield /% | Selectivity /%    |                    |           |
|-------------|--------------------------|-------------------------------|-------------------|--------------------|-----------|
|             |                          |                               | <i>n</i> -Butanol | 2-Ethyl<br>butanol | 1-Hexanol |
| 9           | 47.3                     | 13.4                          | 28.3              | 4.6                | 3.3       |
| 10          | 42.0                     | 14.0                          | 33.3              | 4.5                | 6.9       |
| 11          | 35.9                     | 14.4                          | 40.2              | 7.7                | 9.9       |

Reaction conditions: a weight percentage of catalyst=10 wt%, t=6 h, T=230 °C.
